# Supplementary material for: M2 macrophage is the predominant phenotype in airways inflammatory lesions in patients with granulomatosis with polyangiitis
Source: Springer Nature journal article supplement (doi:10.1186/s13075-017-1310-4), 2017-05-18
Supplement: MOESM1 [file 12297812]

**Table S1** – Analysis of lymphocytes and macrophages in relation to disease extension, disease stage and positivity of nasal culture in GPA.

| <b>Variables</b>                         | <b>Groups</b>                  |                             |                 |
|------------------------------------------|--------------------------------|-----------------------------|-----------------|
| <b>Disease extension</b>                 | <b>Generalized<br/>(n=6)</b>   | <b>Localized<br/>(n=29)</b> | <b><i>p</i></b> |
| CD3, %                                   | 5.9 (4.8-10.8)                 | 7.9 (5.4-14.8)              | 0.336           |
| CD20, %                                  | 2.7 (1.6-8.0)                  | 4.3 (2.5-9.1)               | 0.358           |
| CD68, %                                  | 9.8 (6.0-20.5)                 | 8.9 (6.7-18.1)              | 0.896           |
| CD86, %                                  | 13.1 (5.7-28.1)                | 19.6 (10.0-34.2)            | 0.314           |
| CD163, %                                 | 33.4 (21.9-47.9)               | 32.4 (20.9-41.9)            | 0.965           |
| <b>Disease stage</b>                     | <b>Disease onset<br/>(n=9)</b> | <b>Relapse<br/>(n=25)</b>   | <b><i>p</i></b> |
| CD3, %                                   | 7.9 (5.9-10.8)                 | 7.2 (5.1-14.8)              | 0.740           |
| CD20, %                                  | 5.9 (2.9-11.6)                 | 3.9 (1.9-8.5)               | 0.160           |
| CD68, %                                  | 11.2 (6.8-20.3)                | 8.6 (5.8-15.6)              | 0.545           |
| CD86, %                                  | 16.0 (6.6-26.9)                | 18.2 (11.6-39.3)            | 0.219           |
| CD163, %                                 | 31.3 (23.5-39.7)               | 32.4 (20.2-41.4)            | 0.953           |
| <b>Nasal culture for <i>S aureus</i></b> | <b>Positive<br/>(n=19)</b>     | <b>Negative<br/>(n=15)</b>  | <b><i>p</i></b> |
| CD3, %                                   | 10.5 (6.6-15.4)                | 5.9 (4.8-7.4)               | 0.014*          |
| CD20, %                                  | 4.3 (2.5-7.6)                  | 3.1 (1.9-9.7)               | 0.579           |
| CD68, %                                  | 7.7 (5.2-17.1)                 | 8.9 (7.7-23.4)              | 0.323           |
| CD86, %                                  | 18.2 (7.4-38.0)                | 20.6 (12.5-29.5)            | 0.521           |
| CD163, %                                 | 33.7 ± 15.0                    | 37.4 ± 19.3                 | 0.537           |

Data are presented as median and interquartile range. One patient with persisting disease was excluded from this analysis. Data are presented as median and interquartile range.
