# Supplementary material for: M2 macrophage is the predominant phenotype in airways inflammatory lesions in patients with granulomatosis with polyangiitis
Source: Springer Nature journal article supplement (doi:10.1186/s13075-017-1310-4), 2017-05-18
Supplement: MOESM2 [file 12297812]

**Table S2** - Evaluation of lymphocyte and macrophage scores in relation to therapy for GPA.

| <b>Variables</b>                                                                | <b>Groups</b>              |                                |          |
|---------------------------------------------------------------------------------|----------------------------|--------------------------------|----------|
| <b>Presence or absence of therapy</b>                                           | <b>Therapy (n=13)</b>      | <b>No therapy (n=22)</b>       | <b>p</b> |
| CD3, %                                                                          | 7.4 (6.2-10.8)             | 7.3 (4.9-15.7)                 | 0.785    |
| CD20, %                                                                         | 5.7 (2.7-8.0)              | 3.9 (1.8-9.9)                  | 0.290    |
| CD68, %                                                                         | 8.3 (6.8-17.3)             | 9.2 (6.0-19.5)                 | 0.946    |
| CD86, %                                                                         | 16.0 (7.4-26.9)            | 20.0 (10.4-38.6)               | 0.339    |
| CD163, %                                                                        | 30.7 ± 15.2                | 37.9 ± 17.2                    | 0.224    |
| <b>Co-trimoxazol in patients with positive nose culture for <i>S aureus</i></b> | <b>Co-trimoxazol (n=7)</b> | <b>No co-trimoxazol (n=12)</b> | <b>p</b> |
| CD3, %                                                                          | 13.4 ± 11.9                | 11.2 ± 5.0                     | 0.575    |
| CD20, %                                                                         | 2.5 (1.9-4.3)              | 6.2 (3.0-9.6)                  | 0.117    |
| CD68, %                                                                         | 6.3 (5.1-13.3)             | 13.4 (6.6-18.7)                | 0.083    |
| CD86, %                                                                         | 18.2 (8.3-23.9)            | 18.7 (6.3-38.7)                | 0.966    |
| CD163, %                                                                        | 31.1 ± 12.8                | 35.2 ± 16.5                    | 0.585    |
| <b>Co-trimoxazol in patients with negative nose culture for <i>S aureus</i></b> | <b>Co-trimoxazol (n=7)</b> | <b>No co-trimoxazol (n=8)</b>  | <b>p</b> |
| CD3, %                                                                          | 5.1 (3.6-8.9)              | 6.2 (4.9-7.2)                  | 0.778    |
| CD20, %                                                                         | 7.7 ± 7.9                  | 4.1 ± 3.5                      | 0.271    |
| CD68, %                                                                         | 9.6 (8.6-20.7)             | 8.1 (7.3-28.1)                 | 0.778    |
| CD86, %                                                                         | 23.4 (13.0-40.7)           | 18.8 (11.2-24.4)               | 0.535    |
| CD163, %                                                                        | 34.4 ± 14.3                | 39.9 ± 23.5                    | 0.601    |
| <b>Use of prednisolone</b>                                                      | <b>Prednisolone (n=10)</b> | <b>No prednisolone (n=25)</b>  | <b>p</b> |
| CD3, %                                                                          | 5.4 (4.3-9.8)              | 8.0 (6.2-14.8)                 | 0.068    |
| CD20, %                                                                         | 5.6 (1.8-10.9)             | 4.0 (2.5-7.4)                  | 0.827    |
| CD68, %                                                                         | 15.1 (6.7-26.4)            | 8.3 (6.3-14.8)                 | 0.144    |
| CD86, %                                                                         | 23.7 (12.4-41.3)           | 18.2 (8.1-24.2)                | 0.243    |
| CD163, %                                                                        | 43.7 ± 20.2                | 31.8 ± 14.0                    | 0.055    |

Data are presented as mean and standard deviation or as median and interquartile range.
