# Supplementary material for: M2 macrophage is the predominant phenotype in airways inflammatory lesions in patients with granulomatosis with polyangiitis
Source: Springer Nature journal article supplement (doi:10.1186/s13075-017-1310-4), 2017-05-18
Supplement: MOESM3 [file 12297812]

**Table S3** – Correlations of lymphocytes and macrophages in airway biopsies with prednisolone daily dose in GPA patients.

| <b>Variables</b> | <b>Daily prednisolone dose in mg</b> |
|------------------|--------------------------------------|
| CD3              | Rho = 0.006; $p = 0.986$             |
| CD20             | Rho = -0.006; $p = 0.986$            |
| CD68             | Rho = 0.858; $p = 0.001^*$           |
| CD86             | Rho = 0.753; $p = 0.012^*$           |
| CD163            | Rho = 0.759; $p = 0.011^*$           |

\*Significant correlations.
