# Supplementary material for: M2 macrophage is the predominant phenotype in airways inflammatory lesions in patients with granulomatosis with polyangiitis
Source: Springer Nature journal article supplement (doi:10.1186/s13075-017-1310-4), 2017-05-18
Supplement: MOESM4 [file 12297812]

**Table S4** – Univariate linear regression to analyze associations between macrophage markers and therapy in GPA patients.

| <b>Variables</b>                   | <b><math>\beta</math> coefficient</b> | <b>R<sup>2</sup></b> | <b><i>p</i></b> |
|------------------------------------|---------------------------------------|----------------------|-----------------|
| CD68 and prednisolone dose         | 1.16                                  | 0.739                | 0.001           |
| CD86 and prednisolone dose         | 1.53                                  | 0.723                | 0.002           |
| CD163 and prednisolone dose        | 1.48                                  | 0.545                | 0.015           |
| CD68 and immunosuppressive agents  | 7.26                                  | 0.138                | 0.028           |
| CD86 and immunosuppressive agents  | 11.49                                 | 0.153                | 0.020           |
| CD163 and immunosuppressive agents | 14.64                                 | 0.185                | 0.010           |
