# Supplementary material for: M2 macrophage is the predominant phenotype in airways inflammatory lesions in patients with granulomatosis with polyangiitis
Source: Springer Nature journal article supplement (doi:10.1186/s13075-017-1310-4), 2017-05-18
Supplement: MOESM5 [file 12297812]

**Table S5** - Multivariate linear regression models to analyze associations between CD3, CD20, CD68, CD86 and CD163 scores in airway biopsies and disease parameters/therapy in GPA patients.

| <b>Associations between CD3 scores and disease parameters/therapy</b>   |                                       |                 |
|-------------------------------------------------------------------------|---------------------------------------|-----------------|
| <b>Variables</b>                                                        | <b><math>\beta</math> coefficient</b> | <b><i>p</i></b> |
| Age                                                                     | -0.53                                 | 0.292           |
| Female gender                                                           | 1.39                                  | 0.836           |
| Positive nasal culture for <i>Staphylococcus aureus</i>                 | -4.52                                 | 0.492           |
| Generalized disease                                                     | 4.29                                  | 0.606           |
| Use of co-trimoxazole                                                   | 3.58                                  | 0.561           |
| Daily dose of prednisone, mg                                            | 0.10                                  | 0.788           |
| Use of immunosuppressive agents                                         | 18.85                                 | 0.201           |
| <b>Associations between CD20 scores and disease parameters/therapy</b>  |                                       |                 |
| <b>Variables</b>                                                        | <b><math>\beta</math> coefficient</b> | <b><i>p</i></b> |
| Age                                                                     | -1.37                                 | 0.156           |
| Female gender                                                           | -12.30                                | 0.328           |
| Positive nasal culture for <i>Staphylococcus aureus</i>                 | -13.43                                | 0.267           |
| Generalized disease                                                     | 20.46                                 | 0.217           |
| Use of co-trimoxazole                                                   | 18.59                                 | 0.158           |
| Daily dose of prednisone, mg                                            | 1.03                                  | 0.201           |
| Use of immunosuppressive agents                                         | 23.73                                 | 0.282           |
| <b>Associations between CD68 scores and disease parameters/therapy</b>  |                                       |                 |
| <b>Variables</b>                                                        | <b><math>\beta</math> coefficient</b> | <b><i>p</i></b> |
| Age                                                                     | 0.28                                  | 0.552           |
| Female gender                                                           | 20.66                                 | 0.080           |
| Positive nasal culture for <i>Staphylococcus aureus</i>                 | 9.82                                  | 0.228           |
| Generalized disease                                                     | -16.40                                | 0.159           |
| Use of co-trimoxazole                                                   | -10.94                                | 0.184           |
| Daily dose of prednisone, mg                                            | 0.59                                  | 0.238           |
| Use of immunosuppressive agents                                         | 6.05                                  | 0.625           |
| <b>Associations between CD86 scores and disease parameters/therapy</b>  |                                       |                 |
| <b>Variables</b>                                                        | <b><math>\beta</math> coefficient</b> | <b><i>p</i></b> |
| Age                                                                     | -0.64                                 | 0.648           |
| Female gender                                                           | -0.60                                 | 0.977           |
| Positive nasal culture for <i>Staphylococcus aureus</i>                 | -14.03                                | 0.504           |
| Generalized disease                                                     | 16.40                                 | 0.545           |
| Use of co-trimoxazole                                                   | 9.94                                  | 0.610           |
| Daily dose of prednisone, mg                                            | 1.89                                  | 0.223           |
| Use of immunosuppressive agents                                         | 14.95                                 | 0.687           |
| <b>Associations between CD163 scores and disease parameters/therapy</b> |                                       |                 |
| <b>Variables</b>                                                        | <b><math>\beta</math> coefficient</b> | <b><i>p</i></b> |
| Age                                                                     | 0.45                                  | 0.697           |
| Female gender                                                           | 36.48                                 | 0.148           |
| Positive nasal culture for <i>Staphylococcus aureus</i>                 | 9.65                                  | 0.576           |
| Generalized disease                                                     | -20.96                                | 0.385           |
| Use of co-trimoxazole                                                   | -23.27                                | 0.237           |
| Daily dose of prednisone, mg                                            | 0.30                                  | 0.771           |
| Use of immunosuppressive agents                                         | 19.53                                 | 0.544           |
